# Supplementary material for: R26R-GR: A Cre-Activable Dual Fluorescent Protein Reporter Mouse
Source: PLOS journal article supplement (doi:10.1371/journal.pone.0046171), 2012-09-25
Supplement: S1 (10.1371/journal.pone.0046171.s001) [file journal.pone.0046171.s001]

**Figure S1**

The R26 targeting event was reconfirmed by a long PCR experiment using primer sequences from the report construct (P4) and a 3' external genomic region (P5) (**A**). Only the successfully targeted R26R-GR allele will result in a 9.4 Kb PCR product (**B**). Genomic DNA from the germline transmitted ES cell clone was used in this study.

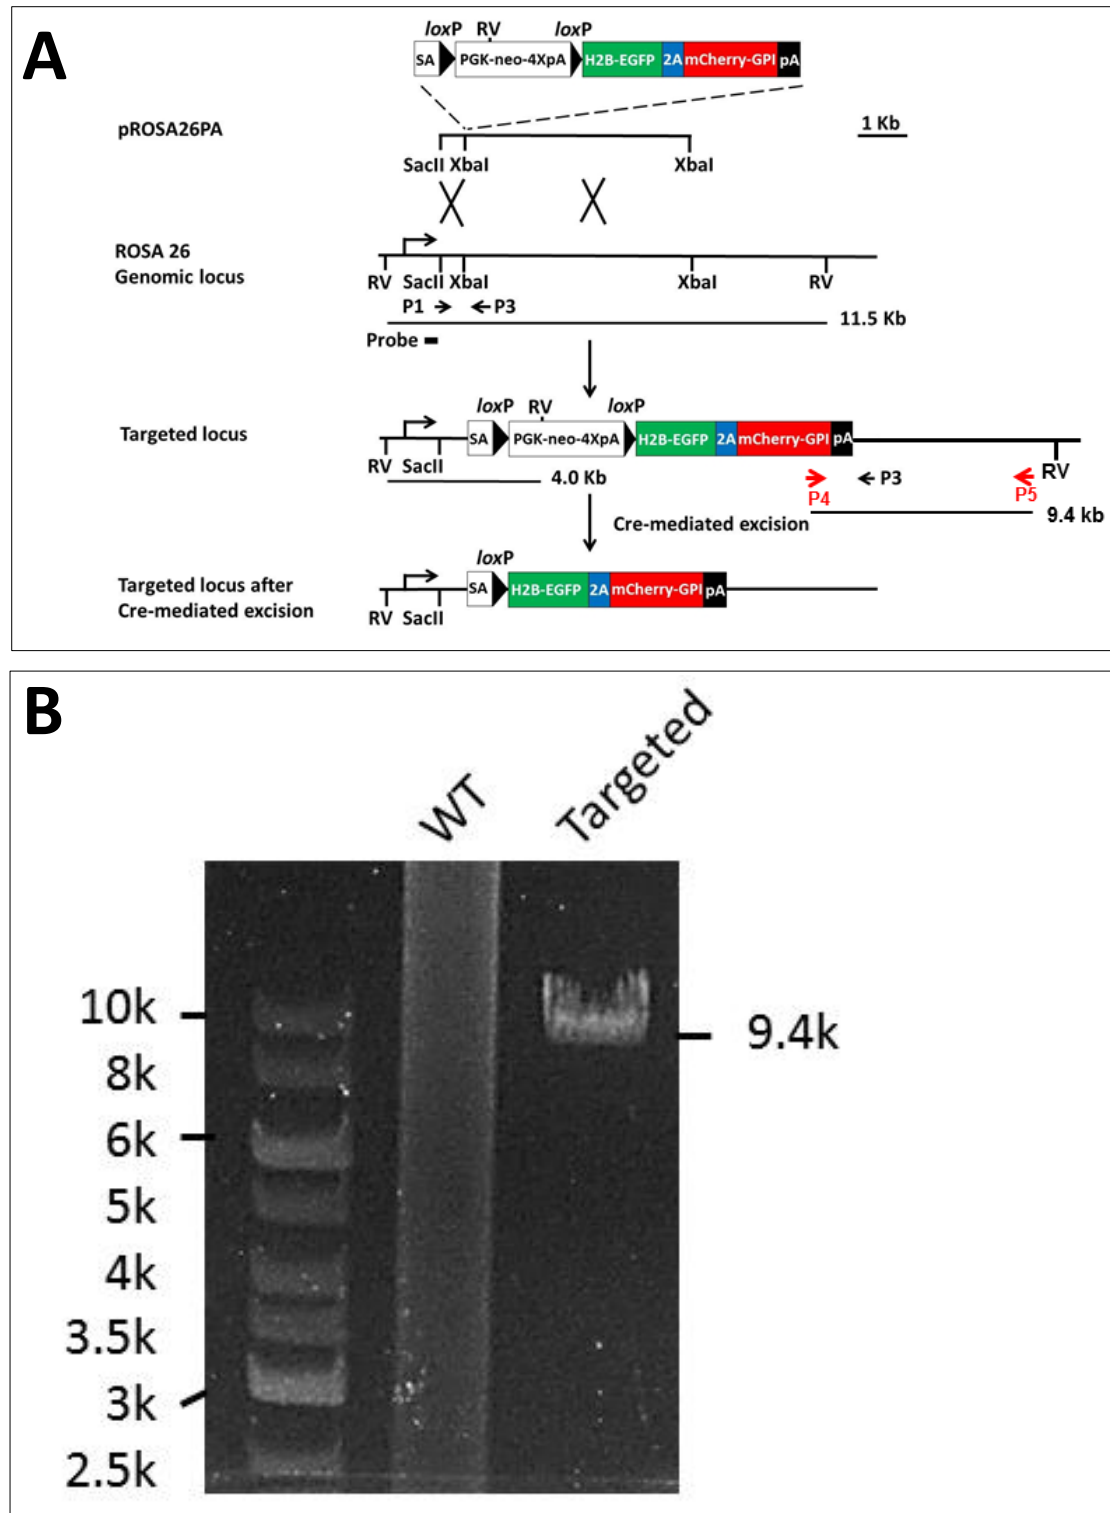

The primer sequences used in this study were the followings:

P4: 5'- CAA CGA GGA CTA CAC CAT CGT GGA ACA GTA CGA -3'

P5: 5'- GGT TGT TTT AGA ATC AGA CTG GTA GCC TAA TGA CT -3'

The reaction mix was the following:

|                                         |     |
|-----------------------------------------|-----|
| Genomic DNA (dil. 10X)                  | 5   |
| 10X Expand long template buffer         | 2   |
| dNTP (10 mM)                            | 10  |
| MgCl <sub>2</sub> (25 mM)               | 2   |
| BSA (10 mg/ml)                          | 0.5 |
| DMSO                                    | 0.5 |
| P4 (10 µM)                              | 2   |
| P5 (10 µM)                              | 2   |
| Expand long template enzyme mix (Roche) | 1   |
| ddH <sub>2</sub> O                      | 22  |
| Total                                   | 50  |

The PCR reaction was performed using the following program:

|       |        |   |           |
|-------|--------|---|-----------|
| 92 °C | 2'     |   |           |
| 92 °C | 10"    |   |           |
| 65 °C | 30"    | ] | 10 cycles |
| 68 °C | 8'     |   |           |
| 92 °C | 10"    |   |           |
| 65 °C | 30"    |   |           |
| 68 °C | 8'+20" | ] | 25 cycles |
| 68 °C | 7'     |   |           |
| 14 °C | ∞      |   |           |
